# Supplementary material for: Direct ink writing with high-strength and swelling-resistant biocompatible physically crosslinked hydrogels
Source: Royal Society of Chemistry journal article supplement (doi:10.1039/c9bm00081j), 2019-01-01
Supplement: c9bm00081j2.pdf [file c9bm00081j2.pdf]

## Supplementary Information

### Direct ink writing of high-strength and swelling-resistant biocompatible physical-crosslinking hydrogels

Pan Jiang,<sup>a,b</sup> Changyou Yan,<sup>a,b</sup> Yuxiong Guo,<sup>a</sup> Xiaoqin Zhang,<sup>a</sup> Meirong Cai,<sup>a</sup> Xin Jia,<sup>c</sup> Xiaolong Wang\*,<sup>a,b,c,d</sup> and Feng Zhou<sup>a</sup>

<sup>a</sup> State Key Laboratory of Solid Lubrication, Lanzhou Institute of Chemical Physics, Chinese Academy of Sciences, Lanzhou, 730000, China.

<sup>b</sup> Center of Materials Science and Optoelectronics Engineering, University of Chinese Academy of Sciences, Beijing, 100049, China.

<sup>c</sup> School of Chemistry and Chemical Engineering, Shihezi University, Shihezi 832003, China.

<sup>d</sup> Yiwu R&D Centre for Functional Materials, LICP, CAS, Yiwu, 322000, China

\* Corresponding author: wangxl@licp.cas.cn

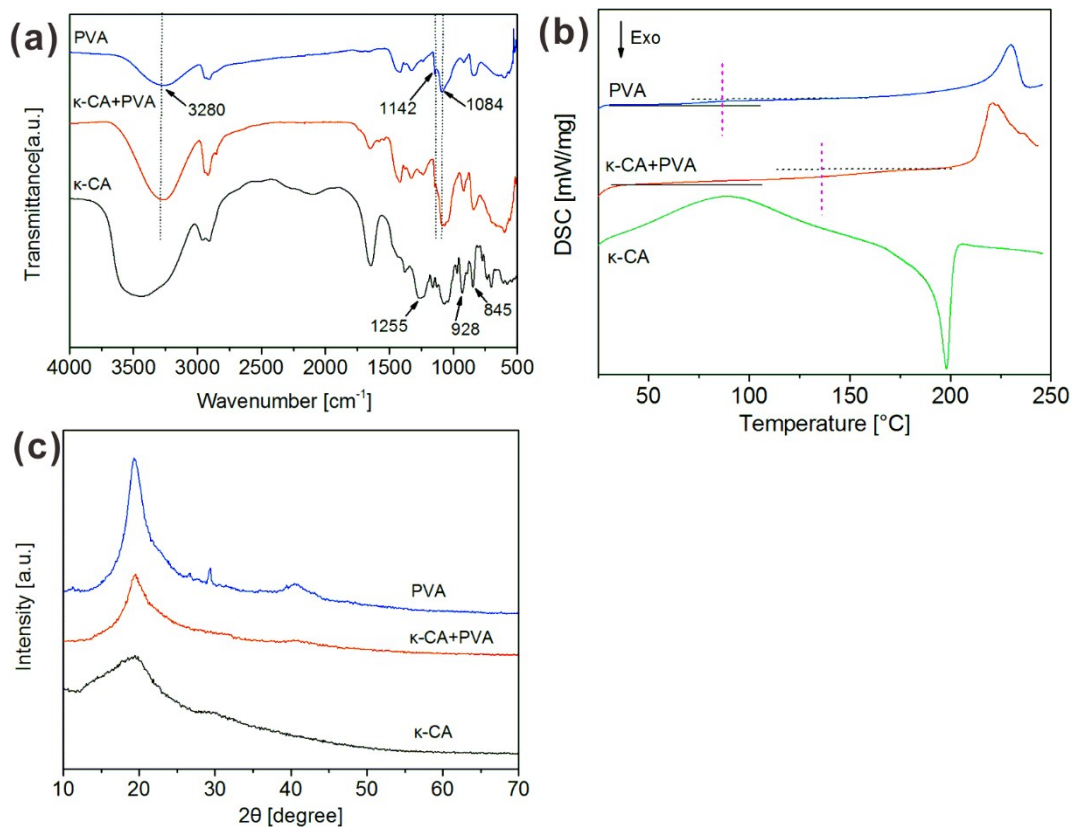

**Fig. S1** (a) FT-IR spectra, (b) DSC curves, (c) X-ray diffraction profiles of hydrogels after freezing-thawing routes.

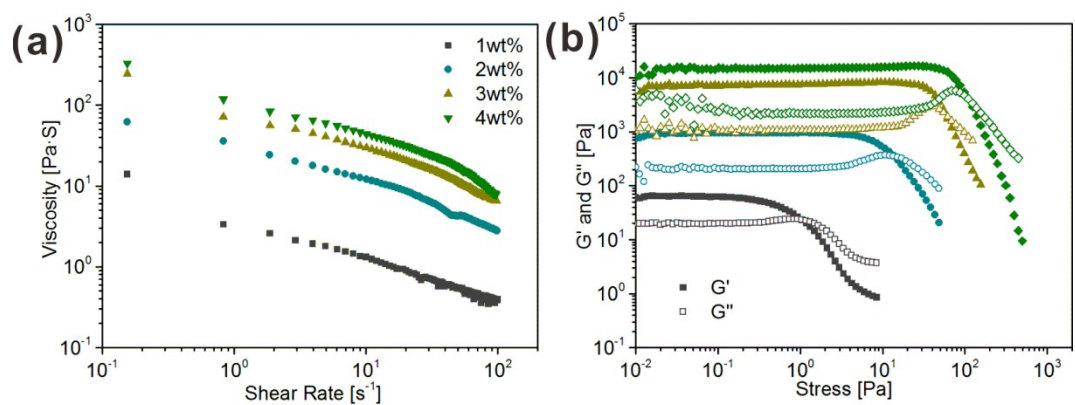

**Fig. S2** Rheological properties of κ-C A with different concentrations.

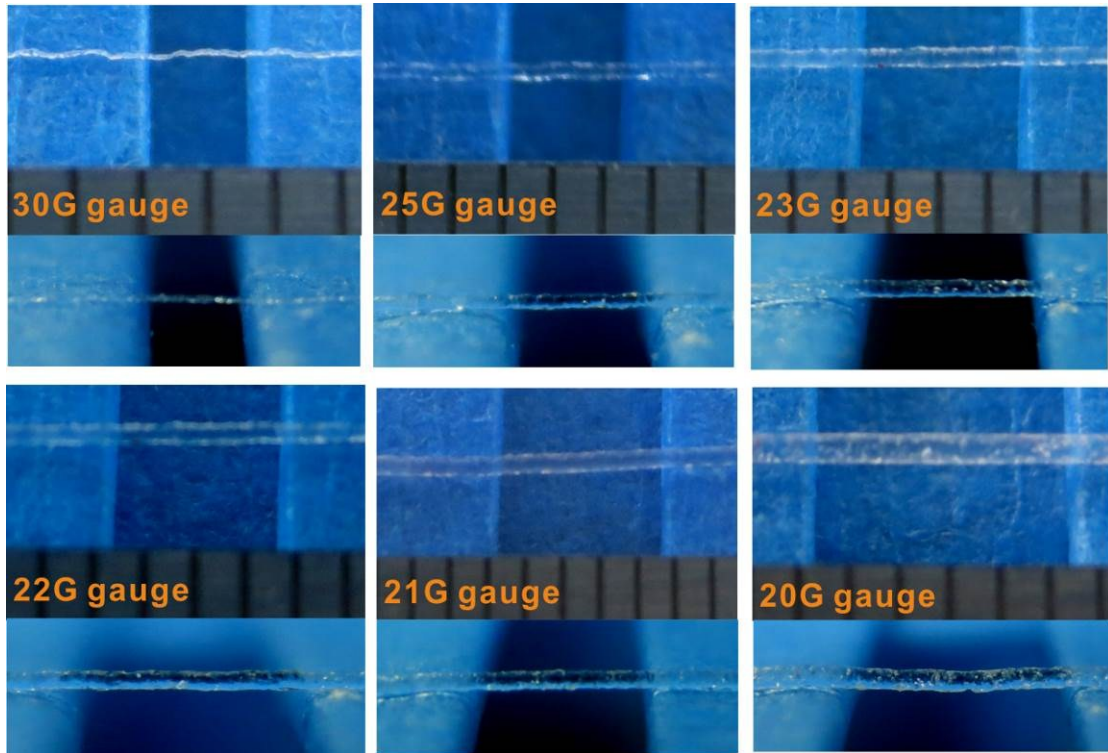

**Fig. S3** Span length of hydrogel filaments extruded from different nozzles (e.g. different diameters).

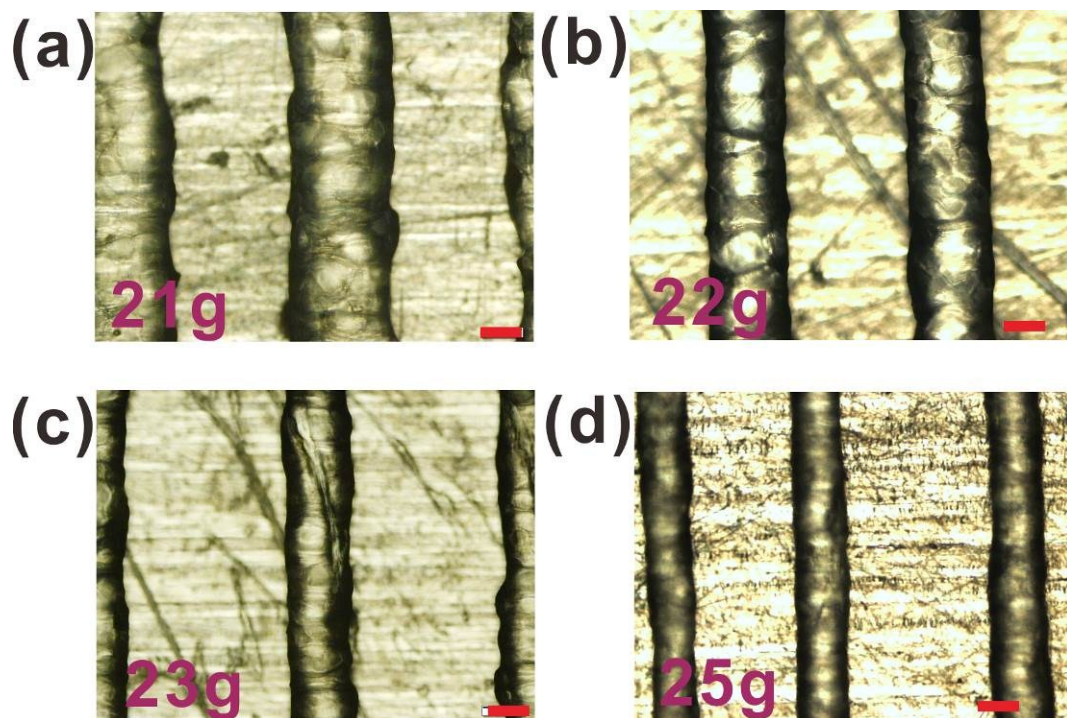

**Fig. S4** Photomicrographs of the real filaments printed by different diameter nozzles. The scale bars are 200  $\mu\text{m}$ .

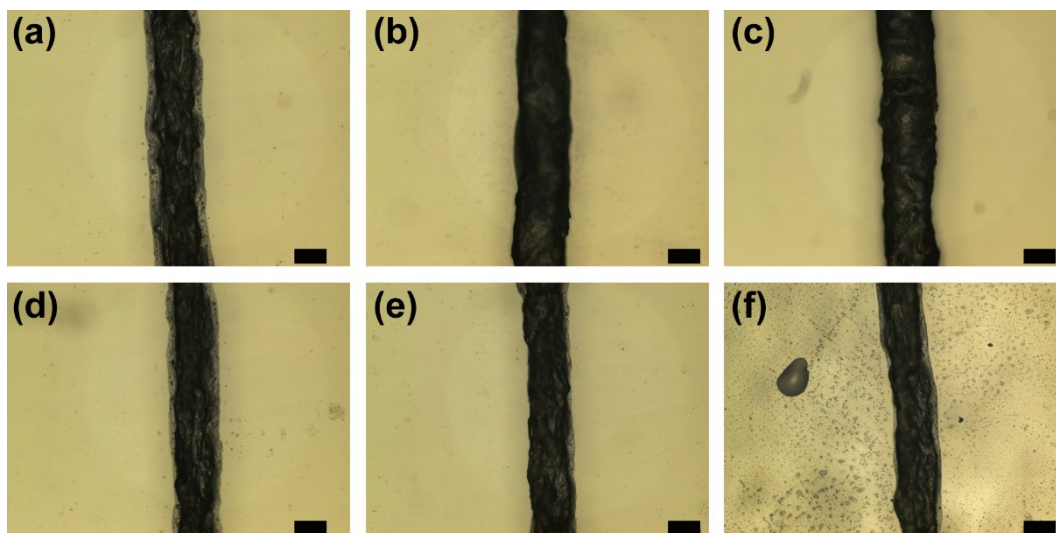

**Fig. S5** Photomicrographs of the real filaments printed under different freezing-thawing cycles. (a) Initial filament and (b)-(f) the 1-5 cycles of freezing-thawing routes. The scalebars are 200  $\mu\text{m}$ .

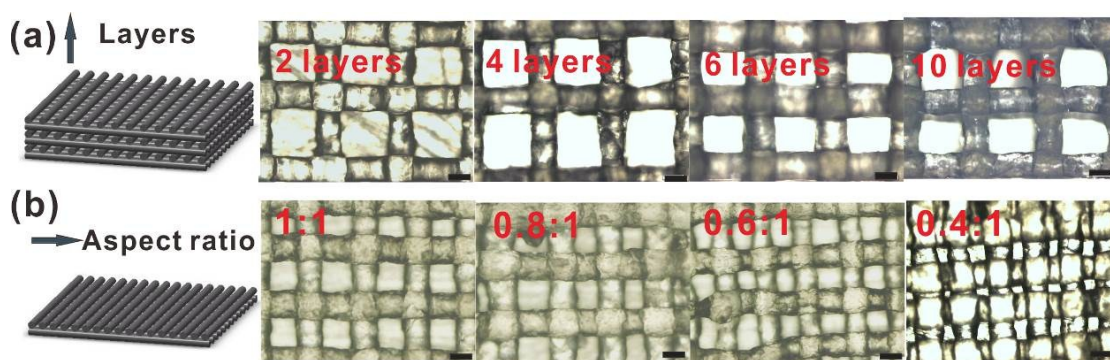

**Fig. S6** (a) Following the vertical, printed woodpile-structured hydrogel scaffolds with different layers. (b) Following the horizontal, printed grids with different aspect ratios. The scalar bars are 200  $\mu\text{m}$ .

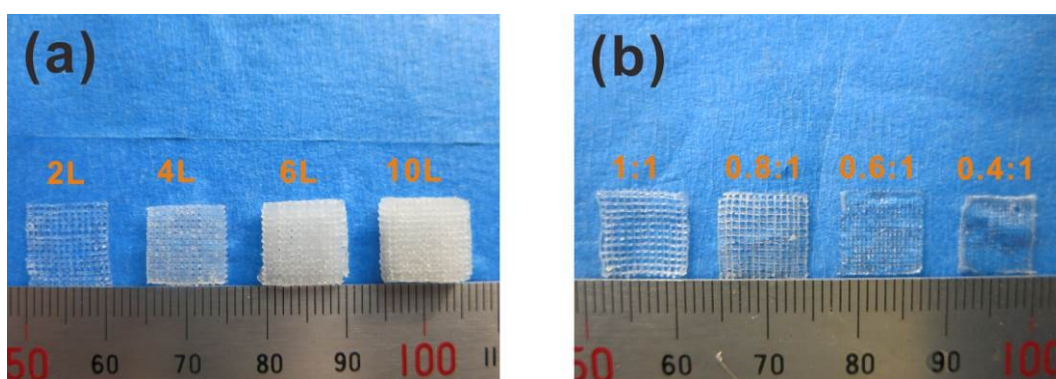

**Fig. S7** The digital images of hydrogel grids with different layers (a) and aspect ratios (b).

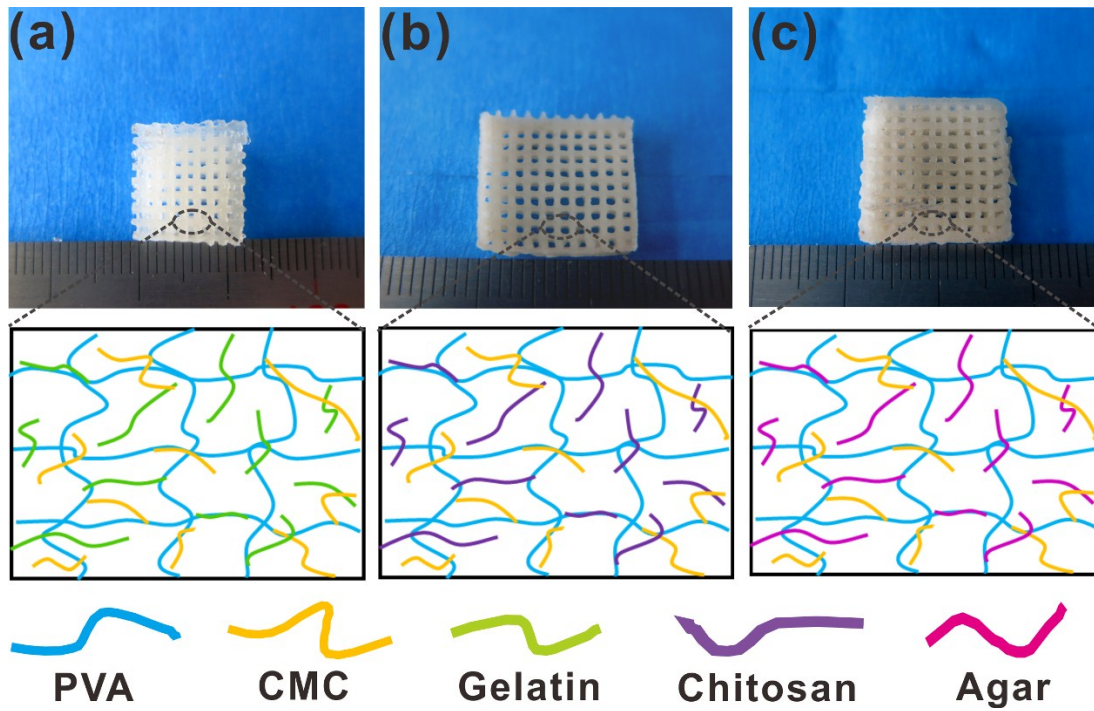

**Fig. S8** 3D printing of physical cross-linking hydrogels with different natural occurring macromolecules.

(a) PVA/gelatin/carboxymethyl cellulose (CMC), (b) PVA/chitosan/CMC, and (c) PVA/agar/CMC.

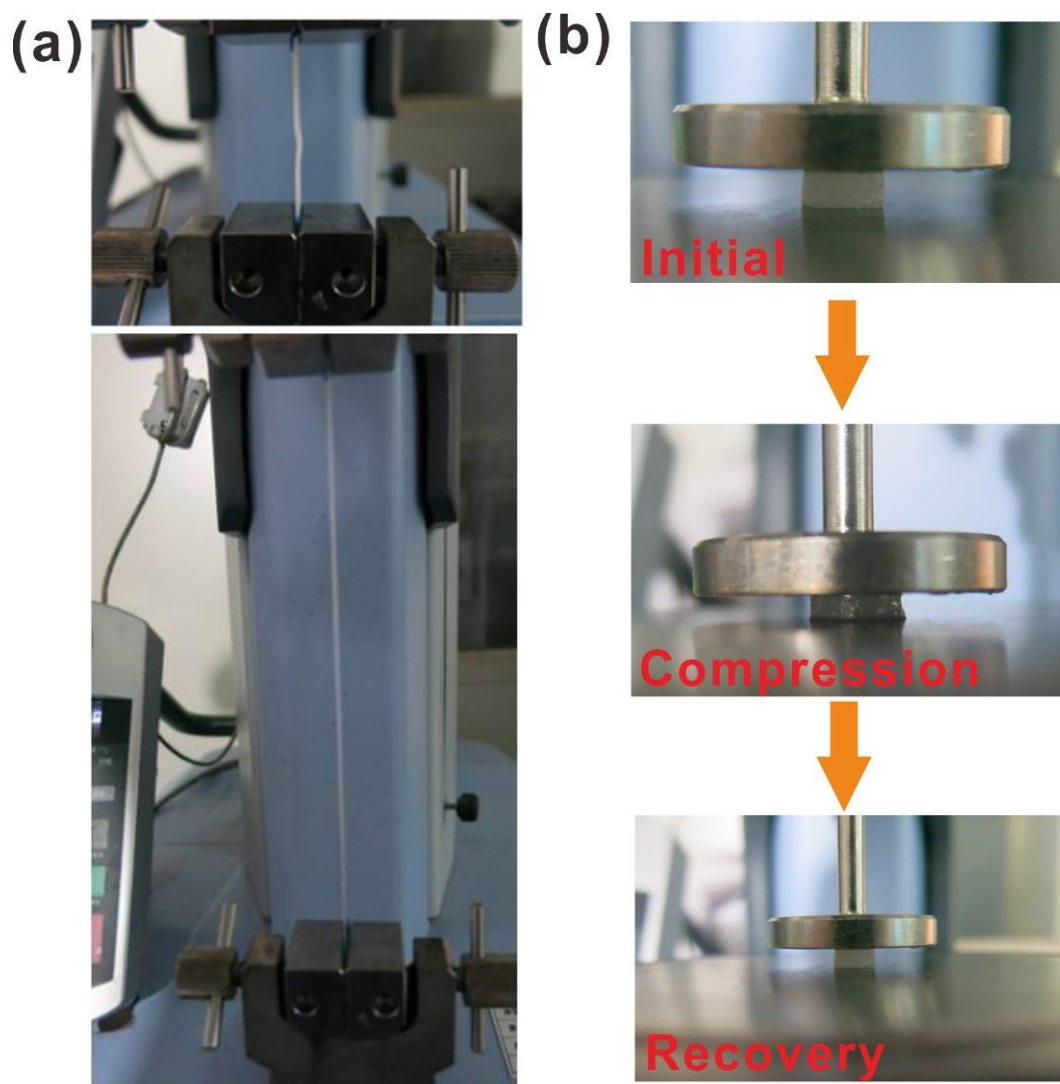

**Fig. S9** Tensile test and compression test of hybrid hydrogels.

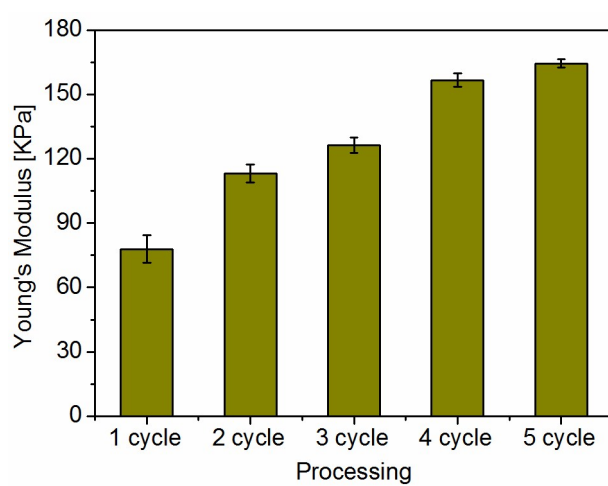

**Fig. S10** The corresponding Young's moduli of hydrogels with different postprocessing.

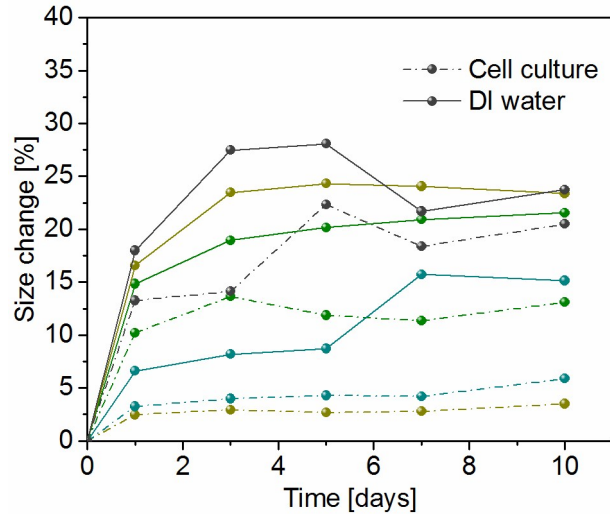

**Fig. S11** The size change of filaments immersing in DI water and cell base at different incubation time.

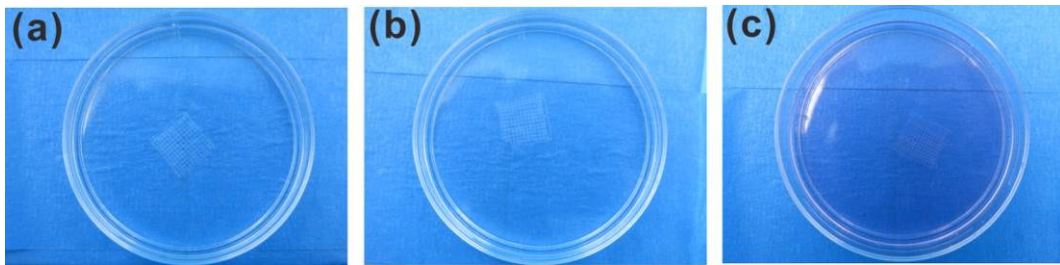

**Fig. S12** The printed two-dimensional networks were immersed in DI water at initial (a) and 10 days (b); in cell culture 10 days (c).

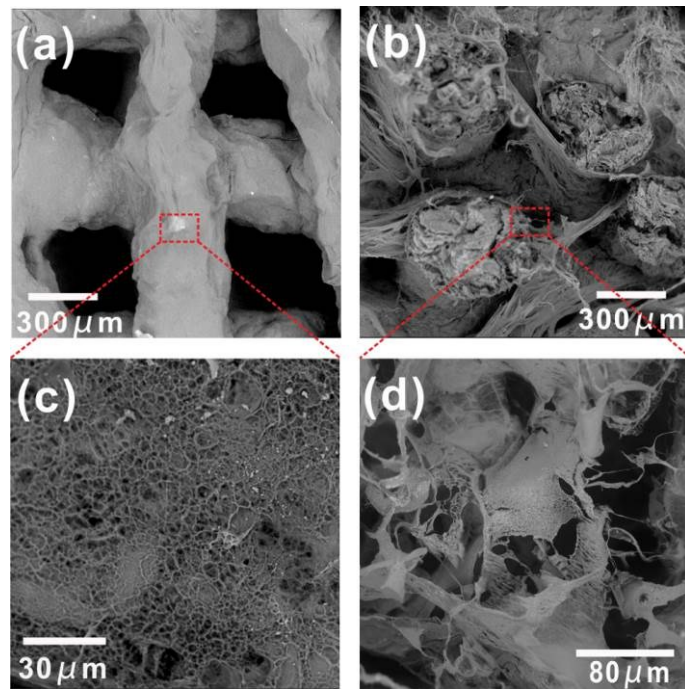

**Fig. S13** SEM images of hydrogel scaffolds. (a) Surface morphology and (b) cross-section morphology.

(c) and (d) the corresponding magnifications.

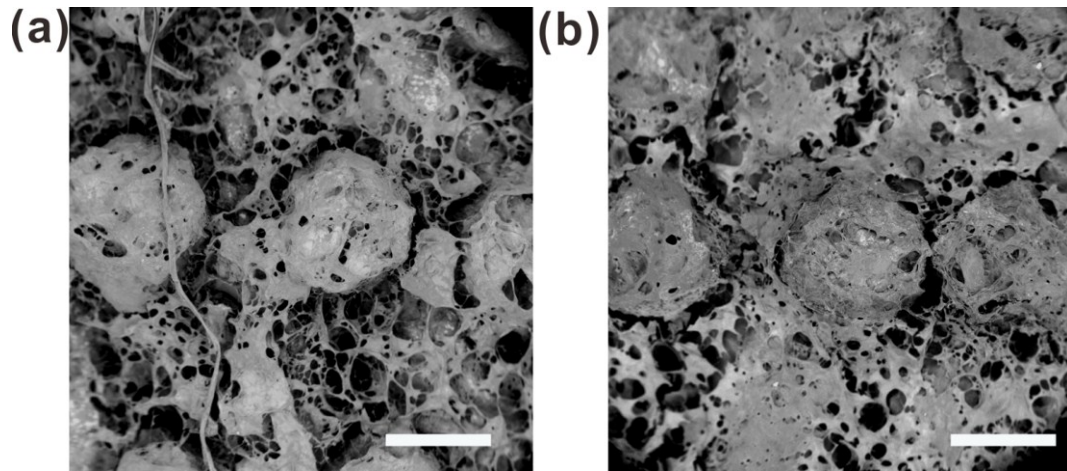

**Fig. S14** SEM images of extra side of hydrogel scaffolds with cell attachment at 3 days (a) and 7 days (b) respectively. The scale bars are 200  $\mu\text{m}$ .

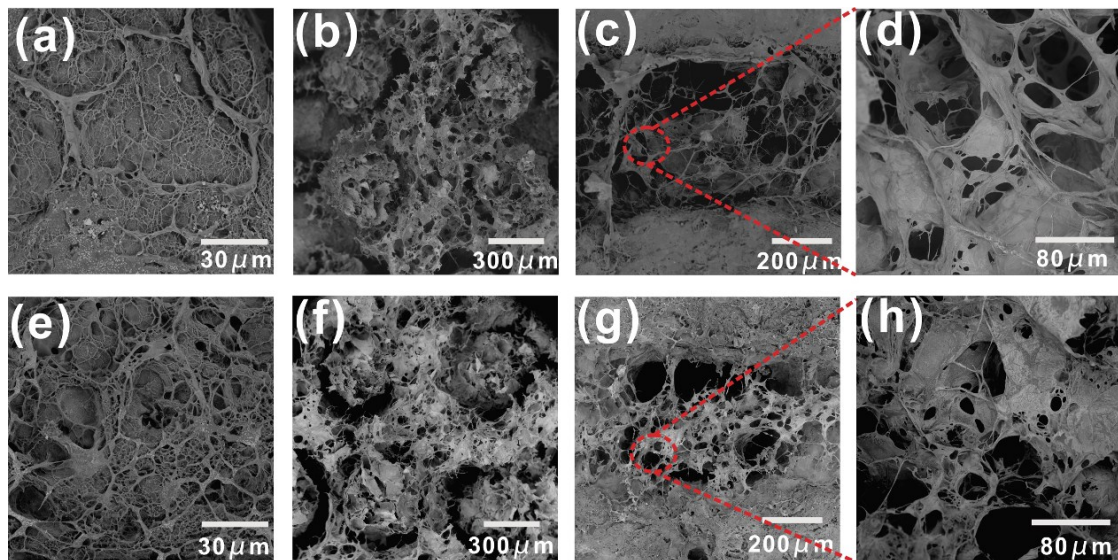

**Fig. S15** SEM images of L929 fibroblast seeded on the woodpile-structured scaffolds at 3 days (top) and 7 days (bottom) respectively.



**Table S1** The simulation of relationship between filament size and moving speed.

| Equation form  |      | $Y = \text{Intercept} + B_1X + B_2X^2$ |                    |                    |
|----------------|------|----------------------------------------|--------------------|--------------------|
| (Moving speed) |      |                                        |                    |                    |
| Needle         | R2   | Intercept ( $\sigma$ )                 | $B_1$ ( $\sigma$ ) | $B_2$ ( $\sigma$ ) |
| 25g            | 0.98 | 584.47(33.62)                          | -108.58(15.01)     | 8.52(1.59)         |
| 23g            | 0.90 | 682.88(70.46)                          | -109.26(32.31)     | 8.06(3.55)         |
| 22g            | 0.90 | 874.01(89.24)                          | -159.82(38.68)     | 12.72(3.93)        |
| 21g            | 0.96 | 1280.22(99.84)                         | -237.58(43.56)     | 16.79(4.52)        |

**Table S2** The simulation of relationship between filament size and extrusion flux.

| Equation form    |      | $Y = \text{Intercept} + B_1X + B_2X^2$ |                    |                    |
|------------------|------|----------------------------------------|--------------------|--------------------|
| (Extrusion flux) |      |                                        |                    |                    |
| Needle           | R2   | Intercept ( $\sigma$ )                 | $B_1$ ( $\sigma$ ) | $B_2$ ( $\sigma$ ) |
| 25g              | 0.99 | 198.24(17.04)                          | 143.63(72.33)      | 82.93(62.21)       |
| 23g              | 0.99 | 285.64(13.27)                          | 326.44(56.64)      | -74.48(49.58)      |
| 22g              | 0.98 | 318.63(22.80)                          | 365.92(97.77)      | -133.91(91.13)     |
| 21g              | 0.92 | 415.96(37.40)                          | 476.35(160.27)     | -204.84(143.09)    |

**Movie S1** The fluid transportant of printed bunched tube.

## Experimental section

### Materials

Carboxymethylcellulose (CMC) sodium salt was purchased from Sigma-Aldrich (Shanghai) Trading Co., Ltd. Chitosan (deacetylation: 85%) was purchased from J&K Scientific Ltd. Gelatin and agar were purchased from Sinopharm Chemical Reagent Co., Ltd. All chemical agents were directly used without any purification.

### **Ink preparation**

The CMC (15 wt%) was dissolved into DI water at 60 °C with vigorous string. The PVA solution (10 wt%) and CMC solution were mixed with the volume ratio of 1. The gelatin (10 wt%) was dissolved into DI water at 50 °C with vigorous strring and then cooled to RT. The chitosan (15 wt% of PVA+CMC solution) and agar (10 wt% PVA+CMC solution) were added into the mixed solution (PVA+CMC) with vigorous stirring respectively. The gelatin gel (10 wt% of PVA+CMC solution) was blended into the mixture (PVA+CMC) with with vigorous stirring. Finally, all above of hybrid hydrogel inks were kept overnight at RT.
